# Supplementary material
Source: PubMed Central journal article supplement (PMC3485933)
Supplement: AEM.01822-12_zam999103816so1.pdf [file AEM.01822-12_zam999103816so1.pdf]

## Supplementary material

Table S1. Primers used in this study.

| Primer name | Primer sequence <sup>a</sup>                                                        | Description                                   |
|-------------|-------------------------------------------------------------------------------------|-----------------------------------------------|
| glpK-D-For  | GCGGTCGTTATGGATCATGACGCGAATATCGTCAGCGTATCA<br>CAGCGTGAC <b>CATATGAATATCCTCCTTAG</b> | Generation of $\Delta$ <i>glpK</i> mutation   |
| glpK-D-Rev  | CTCTTCCCACGCCATTGCGCGTTTAACCGCTTTCTTCCAGCC<br>GCTGTAAC <b>TGTAGGCTGGAGCTGCTTCG</b>  | Generation of $\Delta$ <i>glpK</i> mutation   |
| aceA-D-For  | TCGAAGAATTACAGAAAGAGTGGACACAACCGCGCTGGGAAG<br>GCATCACCT <b>TGTAGGCTGGAGCTGCTTCG</b> | Generation of $\Delta$ <i>aceA</i> mutation   |
| aceA-D-Rev  | TGGTGGTGACTTTGTGCAAGTAACCAGTACCCACTTCTTGCT<br>GGTGGGAAC <b>CATATGAATATCCTCCTTAG</b> | Generation of $\Delta$ <i>aceA</i> mutation   |
| hisD-D-For  | CAATACCCTGATTGACTGGAACAGCTGTAGCCCTGAACAGCA<br>GCGTGCGCT <b>TGTAGGCTGGAGCTGCTTCG</b> | Generation of $\Delta$ <i>hisD</i> mutation   |
| hisD-D-Rev  | TATGGGCGGTGACACGTTCTGCCGCCCAATGTTTCAATGG<br>TTGATGCC <b>CATATGAATATCCTCCTTAG</b>    | Generation of $\Delta$ <i>hisD</i> mutation   |
| gltD-D-For  | GACCTGCAGCGCGTTGATCCGCCGAAGAAACCGCTGAAGATC<br>CGTAAGAT <b>TGTAGGCTGGAGCTGCTTCG</b>  | Generation of $\Delta$ <i>gltD</i> mutation   |
| gltD-D-Rev  | GTAGTTTCATAATCCCGTCAGCCGCCTTACGGCCTTCGGCAAT<br>CGCCGTC <b>CATATGAATATCCTCCTTAG</b>  | Generation of $\Delta$ <i>gltD</i> mutation   |
| rpoE-D-For  | CCTGGTTGAACGGGTCCAGAAGGGAGATCAGAAAGCCTTTAA<br>CTTACTGG <b>CATATGAATATCCTCCTTAG</b>  | Generation of $\Delta$ <i>rpoE</i> mutation   |
| rpoE-D-Rev  | GAACCTTTATTATCAATAGCTTCCCAGCCCGGAAGATACGTG<br>AACGCACCT <b>TGTAGGCTGGAGCTGCTTCG</b> | Generation of $\Delta$ <i>rpoE</i> mutation   |
| ddg-D-For   | TACTGGCTGACGTGGTTTTGGCGTTGGCATCCTCTGGTTACTG<br>GTGCAGCT <b>TGTAGGCTGGAGCTGCTTCG</b> | Generation of $\Delta$ <i>ddg</i> mutation    |
| ddg-D-Rev   | CTTCCCCAACGGGCGAGTCTTGAAACGGCGATGGATCCAGA<br>GATATTGCC <b>CATATGAATATCCTCCTTAG</b>  | Generation of $\Delta$ <i>ddg</i> mutation    |
| nifU-D-For  | CGATCACTATGAGAACCCGCGTAACGTAGGGTCGTTTGACAA<br>CAACGACG <b>CATATGAATATCCTCCTTAG</b>  | Generation of $\Delta$ <i>nifU</i> mutation   |
| nifU-D-Rev  | AATCCGCAATAGCGCTTTAATCGCGTCTTCCGCCAGAATAG<br>AGCAGTGAT <b>TGTAGGCTGGAGCTGCTTCG</b>  | Generation of $\Delta$ <i>nifU</i> mutation   |
| kdpA-D-For  | AGGGCAGGAATAAATGTCAGCGCGCCGACCAGCAGTACCGTG<br>CCGATGAG <b>CATATGAATATCCTCCTTAG</b>  | Generation of $\Delta$ <i>kdpA</i> mutation   |
| kdpA-D-Rev  | GTTATCTGGTCTATGCCCTGATTAATGCGGAGGCGTTCTGAT<br>GGCCGCGCT <b>TGTAGGCTGGAGCTGCTTCG</b> | Generation of $\Delta$ <i>kdpA</i> mutation   |
| kdpE-D-For  | AATTCGGTTTTCGGTAATAAAATGGCGTGGGCGGGTGGGATC<br>TTGTTCCA <b>CATATGAATATCCTCCTTAG</b>  | Generation of $\Delta$ <i>kdpE</i> mutation   |
| kdpE-D-Rev  | TGAAGATGAACAGGCCATCCGCCGCTTTCTGCGCGCCGCGCT<br>GGAAGGCG <b>TGTAGGCTGGAGCTGCTTCG</b>  | Generation of $\Delta$ <i>kdpE</i> mutation   |
| fnr-D-For   | GAGCAGACCTATGATCCCGGAAAAGCGAATTATACGGCGCAT<br>TCAGTCTG <b>TGTAGGCTGGAGCTGCTTCG</b>  | Generation of $\Delta$ <i>fnr</i> mutation    |
| fnrA-D-Rev  | CCGGCGAGGGCCGCCAGCGCATCGCTGTTTTCAATAGTAATA<br>TACTTACC <b>CATATGAATATCCTCCTTAG</b>  | Generation of $\Delta$ <i>fnr</i> mutation    |
| glpK-For    | ATACCTGCGTCGTGGAAGAG                                                                | Verification of $\Delta$ <i>glpK</i> mutation |

---

|             |                        |                                               |
|-------------|------------------------|-----------------------------------------------|
| glpK-Rev    | GGGGAAGGAGGGAATAATTG   | Verification of $\Delta$ <i>glpK</i> mutation |
| aceA-For    | TCTGCACATGAAAACCCGTA   | Verification of $\Delta$ <i>aceA</i> mutation |
| aceA-Rev    | TATCCGGCCTACGCTATCTG   | Verification of $\Delta$ <i>aceA</i> mutation |
| hisD-For    | GGCCTACGTAATGCGTTGAT   | Verification of $\Delta$ <i>hisD</i> mutation |
| hisD-Rev    | GTACCAGGTTGCGGACATTT   | Verification of $\Delta$ <i>hisD</i> mutation |
| gltD-For    | AGGCGCAGTAAGGAATTGAA   | Verification of $\Delta$ <i>gltD</i> mutation |
| gltD-Rev    | CGGCAGGAGAGATATTGAGG   | Verification of $\Delta$ <i>gltD</i> mutation |
| rpoE-For    | CTTGCTCATAGTGCGGCTTA   | Verification of $\Delta$ <i>rpoE</i> mutation |
| rpoE-Rev    | CATCCATCAAAGCGGAAAGT   | Verification of $\Delta$ <i>rpoE</i> mutation |
| ddg-For     | CGCTGCGGATAATGACTCTT   | Verification of $\Delta$ <i>ddg</i> mutation  |
| ddg-Rev     | GCGGCCTTTTTTCAGATGTAG  | Verification of $\Delta$ <i>ddg</i> mutation  |
| nifU-For    | AGCAGGGTGTGGATCTGAAC   | Verification of $\Delta$ <i>nifU</i> mutation |
| nifU-Rev    | GGTATTAACCTCGCGCTGCTG  | Verification of $\Delta$ <i>nifU</i> mutation |
| kdpA-For    | GCATCCGTTAGCGCCTGTAC   | Verification of $\Delta$ <i>kdpA</i> mutation |
| kdpA-Rev    | CTGGAGGTGCTCTGTGAGTG   | Verification of $\Delta$ <i>kdpA</i> mutation |
| kdpE-For    | CGACGCCGAAAATAAATGAC   | Verification of $\Delta$ <i>kdpE</i> mutation |
| kdpE-Rev    | AGGAAAGCCACCTGAACTTG   | Verification of $\Delta$ <i>kdpE</i> mutation |
| fnr-For     | TTCTCCGGGATAGCTCAGAC   | Verification of $\Delta$ <i>fnr</i> mutation  |
| fnrA-Rev    | GGTGAATGAAACAGAGGAAGC  | Verification of $\Delta$ <i>fnr</i> mutation  |
| glpKRT-For  | GACGAGCTGCAGGAAAAAGC   | <i>glpK</i> qRT-PCR primer                    |
| glpKRT-Rev  | AGTTACGCTCGGTGGTTTTCAA | <i>glpK</i> qRT-PCR primer                    |
| aceA-RT-For | TGTACCCGGCAAACCTCTGTTC | <i>aceA</i> qRT-PCR primer                    |
| aceA-RT-Rev | ATCTGATCTGCACGACGAAAAG | <i>aceA</i> qRT-PCR primer                    |
| hisD-RT-For | CGGATGACCGTTCAGGAACT   | <i>hisD</i> qRT-PCR primer                    |
| hisD-RT-Rev | CCGCCAATGTTTTCAATGGTT  | <i>hisD</i> qRT-PCR primer                    |
| ddg-RT-For  | CGGGCTGGACAACCTTACC    | <i>ddg</i> qRT-PCR primer                     |

---

---

|             |                       |                            |
|-------------|-----------------------|----------------------------|
| ddg-RT-Rev  | CATAAAATGCACGCCAACGA  | <i>ddg</i> qRT-PCR primer  |
| nifU-RT-For | AGACGCGCGCTTCAAGACT   | <i>nifU</i> qRT-PCR primer |
| nifU-RT-Rev | CACCCACTCCGTTACCAGAGA | <i>nifU</i> qRT-PCR primer |
| kdpA-RT-For | TGGGACTGGGCATCCTGTT   | <i>kdpA</i> qRT-PCR primer |
| kdpA-RT-Rev | GGTAGCCGCTGCGGATTTA   | <i>kdpA</i> qRT-PCR primer |
| rsuA-RT-For | GGGCGTGAAATTCGTGGTAA  | <i>rsuA</i> qRT-PCR primer |
| rsuA-RT-Rev | GCAGTTTGAAGCCGCATT    | <i>rsuA</i> qRT-PCR primer |

---

<sup>a</sup> Bold font denotes sequences derived from pKD4 (K. A. Datsenko and B. L. Wanner, Proc. Natl. Acad. Sci. U. S. A. 97:6640-6645, 2000).
